# Supplementary material for: High thermoelectric performance and compatibility in Cu3SbSe4–CuAlS2 composites
Source: Royal Society of Chemistry journal article supplement (doi:10.1039/d3ee00128h), 2023-01-01
Supplement: d3ee00128h1.pdf [file d3ee00128h1.pdf]

### Supplementary Information for

High Thermoelectric Performance and Compatibility in  $\text{Cu}_3\text{SbSe}_4\text{-CuAlS}_2$  Composites

Yuling Huang, Xingchen Shen, Guiwen Wang, Bin Zhang, Sikang Zheng, Chun-Chuen

Yang, Xuan Hu, Shaokuan Gong, Guang Han, Guoyu Wang, Xu Lu\*, Xiaoyuan Zhou\*

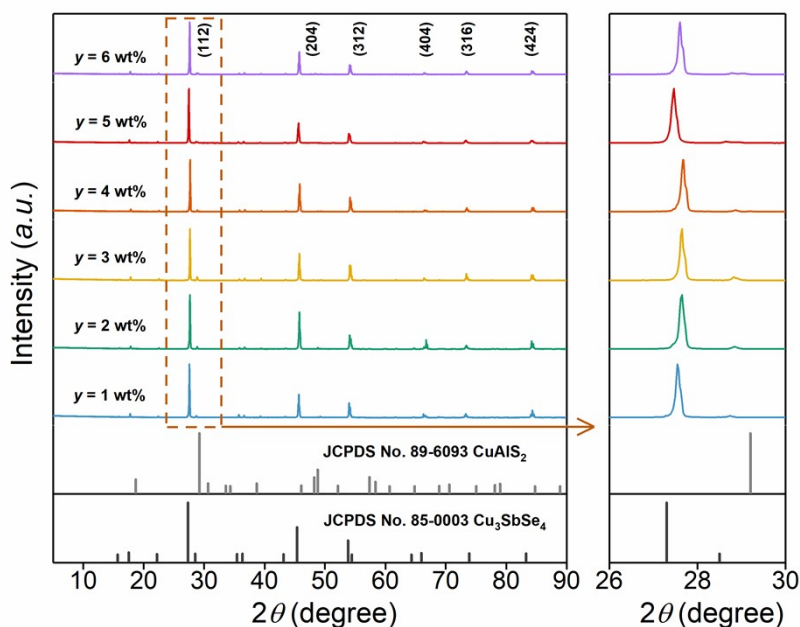

**Supplementary Fig. 1** XRD patterns for the  $\text{Cu}_3\text{SbSe}_4\text{-yCuAlS}_2$  ( $y = 1, 2, 3, 4, 5,$  and  $6$  wt%) samples composites with a magnified X-ray pattern of (112) plane. The majority of the diffraction peaks can be indexed to the  $\text{Cu}_3\text{SbSe}_4$  phase with a tetragonal structure (space group  $I-42m$ ).

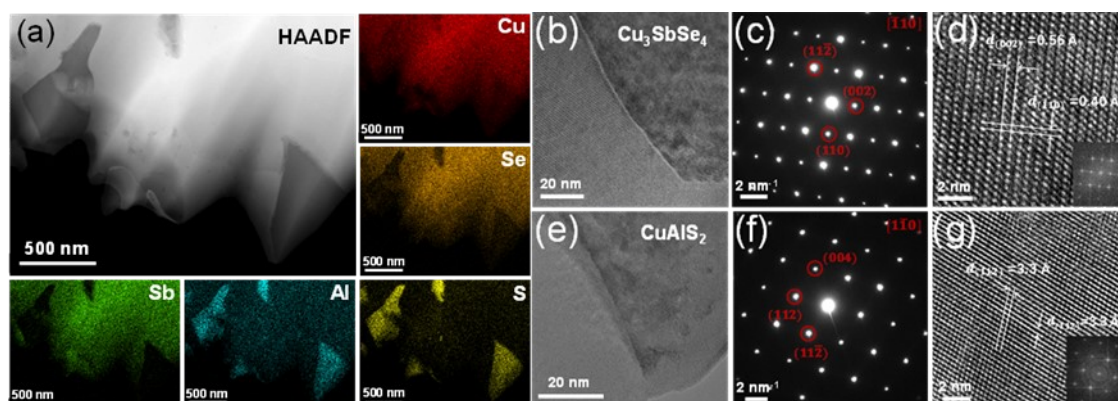

**Supplementary Fig. 2-1** TEM analysis of the  $\text{Cu}_3\text{SbSe}_4\text{-5 wt% CuAlS}_2$  sample. (a) HAADF STEM image of the matrix and  $\text{CuAlS}_2$  precipitates. The corresponding EDS mappings of Cu, Sb, Se, Al and S are on the right-hand side and bottom, which reveal

formation of  $\text{CuAlS}_2$  precipitates. (b) TEM image of the matrix with (c) corresponding selected area electron diffraction (SAED) pattern and (d) high-resolution TEM (HRTEM) image along  $[\bar{1}10]$  zone axis. (e) TEM image of the precipitate with (f) corresponding SAED pattern and (g) HRTEM image along  $[\bar{1}10]$  zone axis.

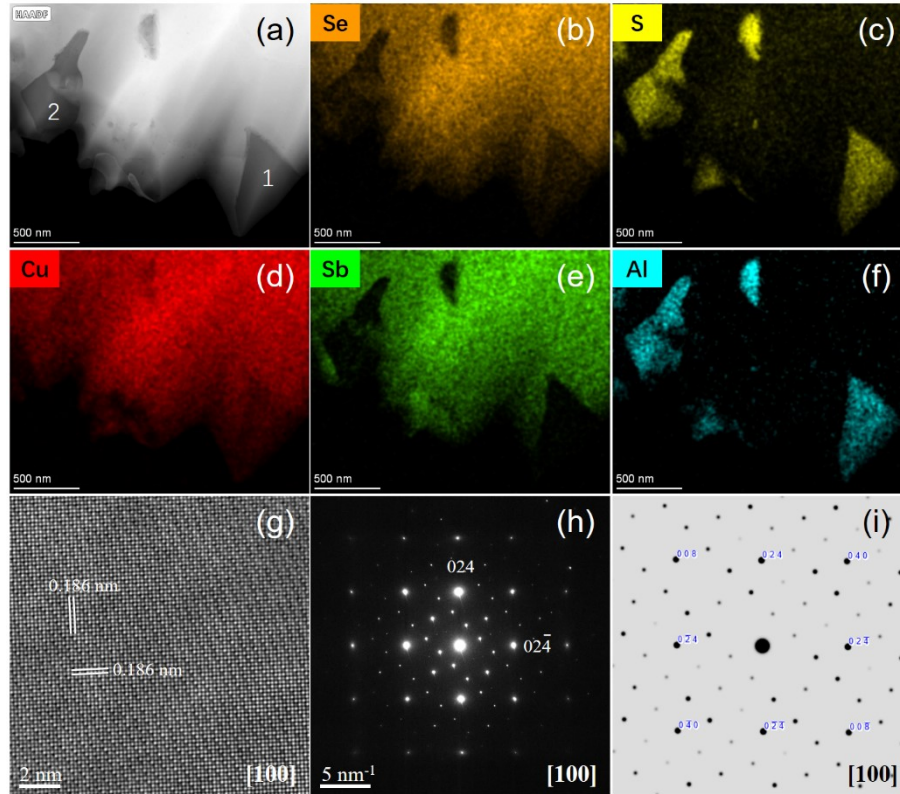

**Supplementary Fig. 2-2** EDX mapping, HRTEM image and SAED pattern of precipitation.

**Supplementary Table 1** Chemical composition of the precipitations.

| Regions in (a) | 1                   | 2     |
|----------------|---------------------|-------|
| Element        | Atomic percentage % |       |
| Cu             | 25.21               | 29.02 |
| Al             | 22.22               | 22.20 |
| Sb             | 0.66                | 0.93  |
| Se             | 18.16               | 13.05 |
| S              | 33.75               | 34.80 |

The precipitates were identified as  $\text{CuAlS}_2$  by chemical composition (EDX) and SAED pattern with HRTEM image.

- 1) Chemical identification: As shown in Supplementary Fig. 2-2, the precipitates (with dimmer contrast) are rich of Al and S, but Cu is still presented only with slight deficiency. Supplementary Table 1 shows the chemical composition of 1 and 2 regions in Supplementary Fig. 2-2a, which demonstrate a chemical composition close to  $\text{CuAl}(\text{S}+\text{Se})_2$ .
- 2) Structure analysis: The SAED pattern (Supplementary Fig. 2-2h) is well consistent with the simulated pattern (Supplementary Fig. 2-2i) of  $\text{CuAlS}_2$ . The lattice spacing of 0.186 nm in the corresponding HRTEM image can be well assigned to the  $\{024\}$  fringes of  $\text{CuAlS}_2$ .

In conclusion, well consistency of chemical composition and structure is sufficient to support the precipitates are  $\text{CuAlS}_2$ .

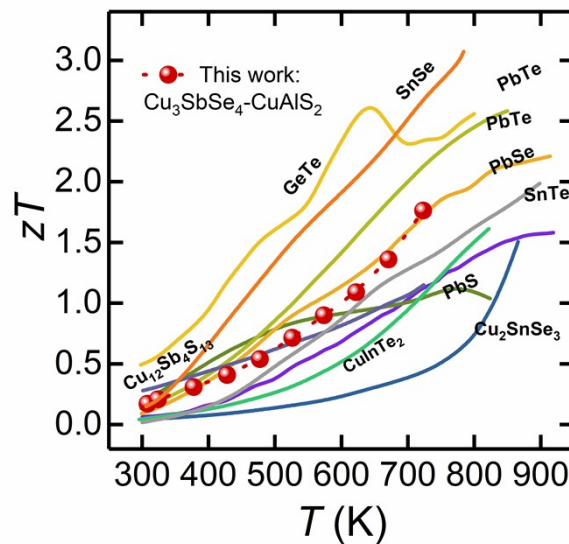

**Supplementary Fig. 3** Temperature-dependent figure of merit  $zT$  for  $\text{Cu}_3\text{SbSe}_4$ -5 wt%  $\text{CuAlS}_2$  with a comparison to that of known state-of-art thermoelectric performance values for *p*-type Pb based chalcogenides<sup>1-4</sup>,  $\text{GeTe}$ <sup>5</sup>,  $\text{SnTe}$ <sup>6</sup>,  $\text{SnSe}$ <sup>7</sup> Cu-based chalcogenides<sup>8-10</sup>.

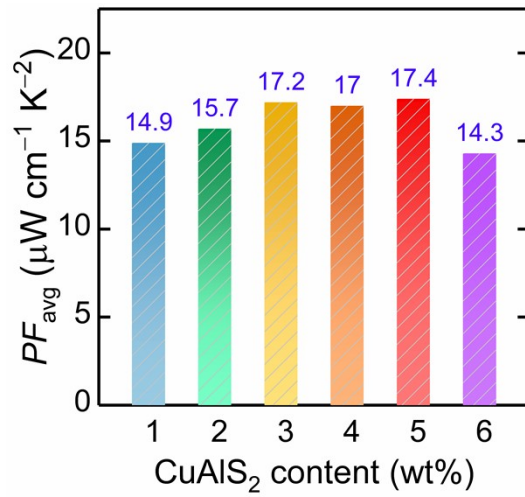

**Supplementary Fig. 4** Average power factors ( $PF_{avg}$ ) within working temperature for  $\text{Cu}_3\text{SbSe}_4\text{-}y\text{CuAlS}_2$  ( $y = 1, 2, 3, 4, 5,$  and  $6$  wt%) samples.

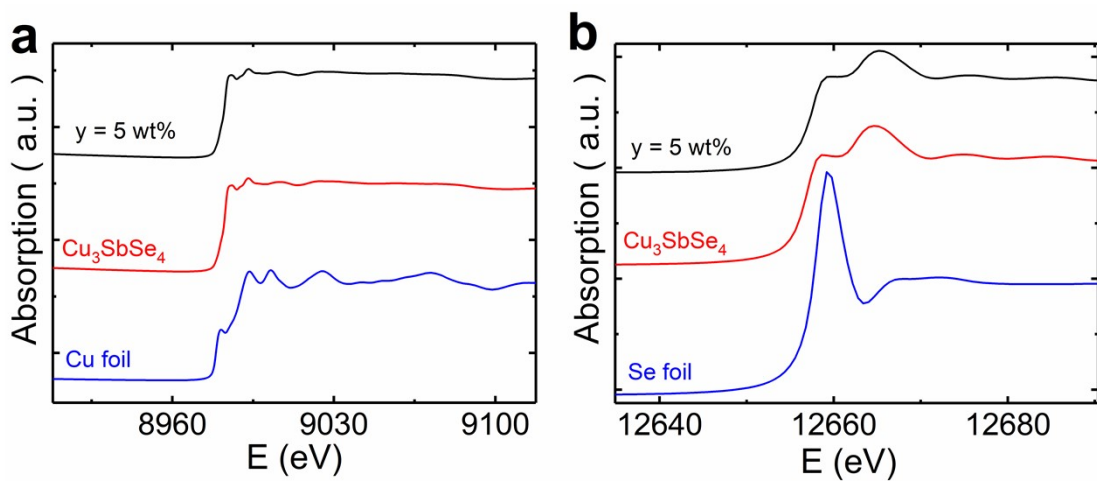

**Supplementary Fig. 5** Extended x-ray absorption fine structure (EXAFS) oscillation of the K-edge of (a) Cu and (b) Se obtained for pristine  $\text{Cu}_3\text{SbSe}_4$  and  $\text{Cu}_3\text{SbSe}_4\text{-}5$  wt%  $\text{CuAlS}_2$ .

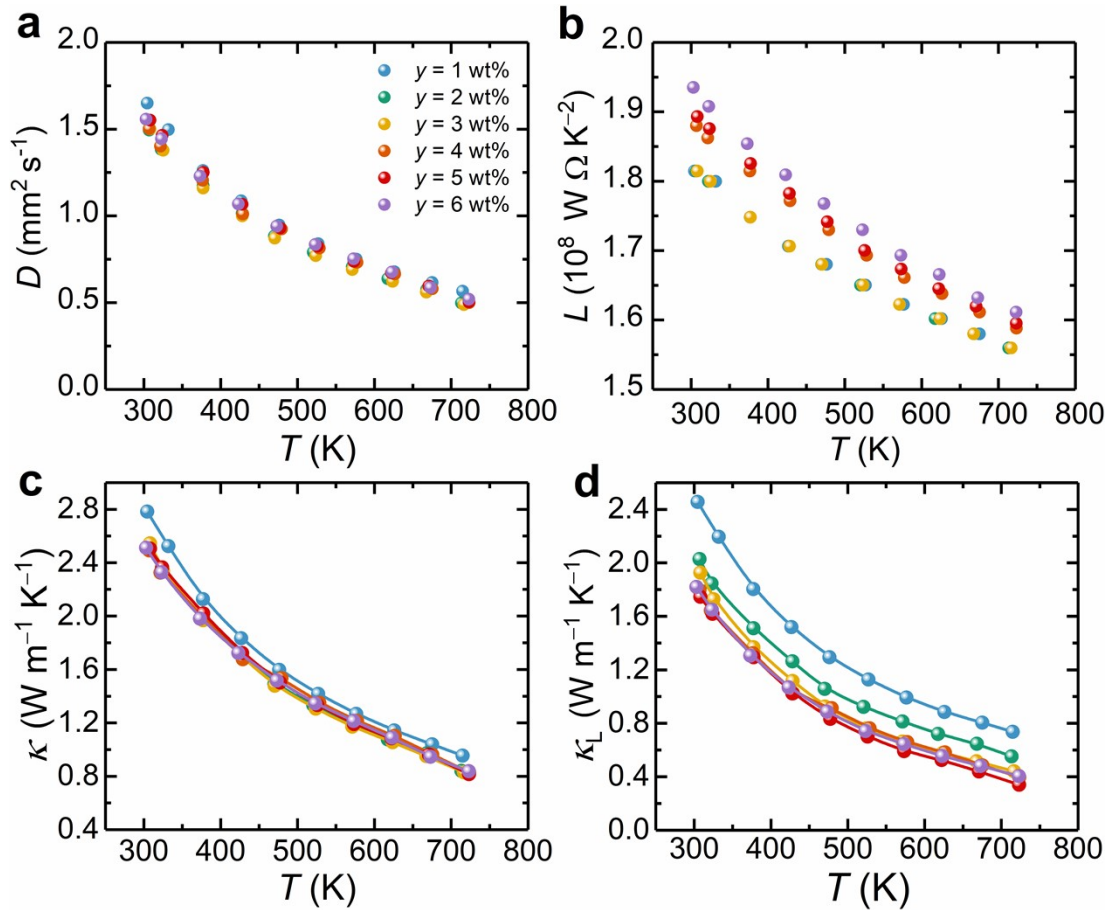

**Supplementary Fig. 6** Temperature dependences of (a) thermal diffusive  $D$ , (b) Lorentz constant  $L$ , (c) total thermal conductivity  $\kappa$  and (d) lattice thermal conductivity  $\kappa_L$  for  $\text{Cu}_3\text{SbSe}_{4-y}\text{CuAlS}_2$  ( $y = 1, 2, 3, 4, 5$ , and  $6$  wt%) samples.

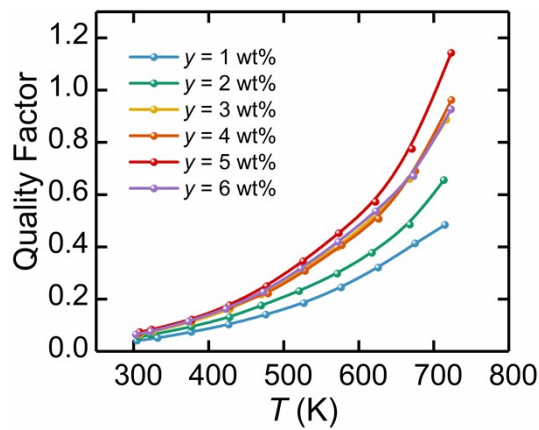

**Supplementary Fig. 7** Material quality factor analysis. Quality factor  $B$  as a function of temperature. The composite sample with  $y = 5$  wt% exhibits a high  $B$  value close to 1.2 at 723 K.



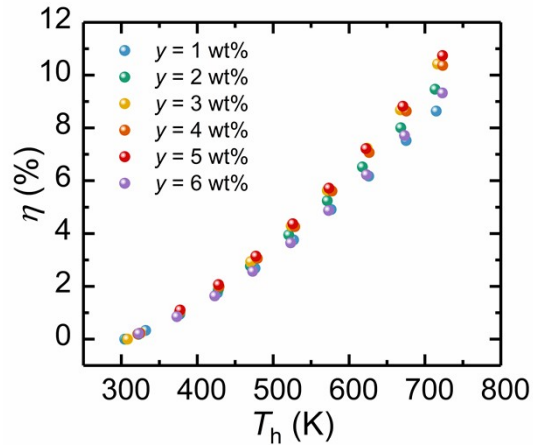

**Supplementary Fig. 8** The predicted conversion efficiency of  $\text{Cu}_3\text{SbSe}_{4-y}\text{CuAlS}_2$  ( $y = 1, 2, 3, 4, 5,$  and  $6$  wt%) as a function of hot-side temperature  $T_h$ .

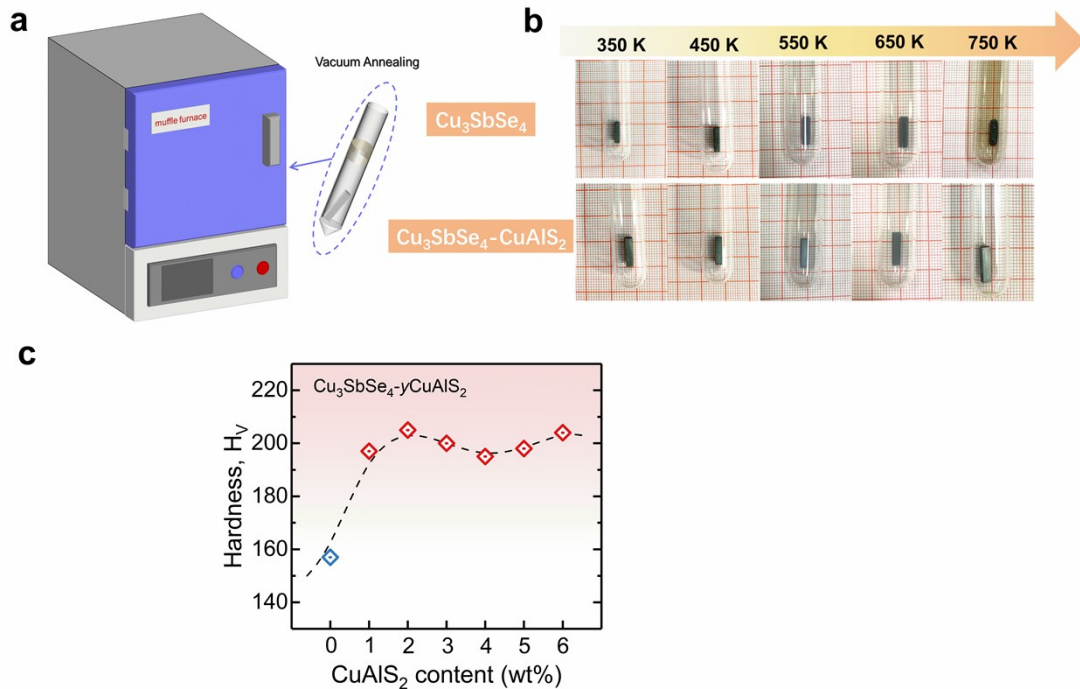

**Supplementary Fig. 9** Thermal stability evaluation of  $\text{Cu}_3\text{SbSe}_{4-y}\text{CuAlS}_2$  ( $y = 0\text{--}6$  wt%) composites. **(a)** Schematic illustration of the heating apparatus to evaluate thermal stability of samples. **(b)** Photographs of  $\text{Cu}_3\text{SbSe}_4$  and  $\text{Cu}_3\text{SbSe}_4\text{-CuAlS}_2$  bulk samples annealed in the quartz tubes for 12 h at different temperatures. **(c)** Vickers hardness values of the samples at room temperature.

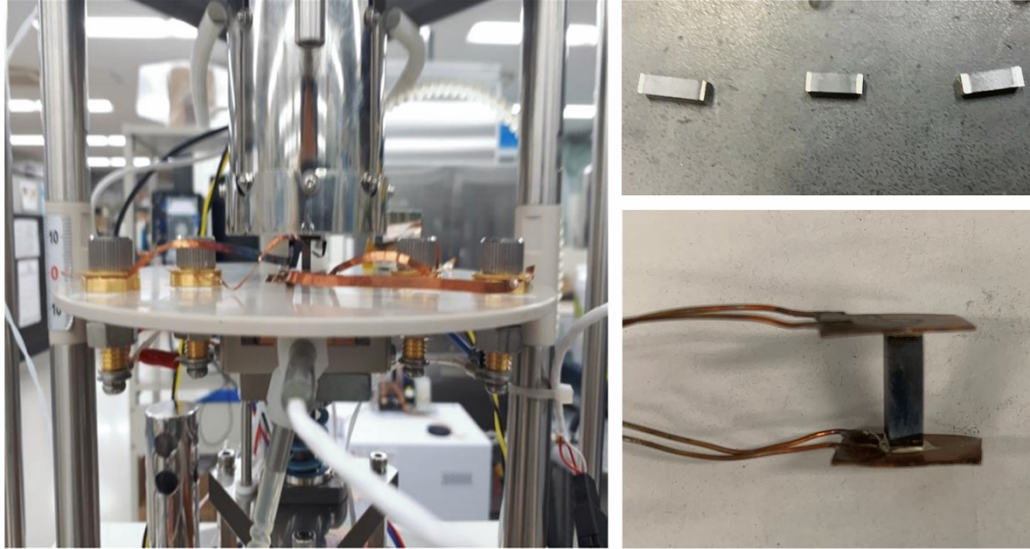

**Supplementary Fig. 10 Mini-PEM for efficiency measurement of  $\text{Cu}_3\text{SbSe}_4$ -5 wt%  $\text{CuAlS}_2$  single-leg device.** The photos on the right are the fabricated thermoelectric single-leg. The obtained bulks were cut into a block with dimensions of  $3 \text{ mm} \times 3 \text{ mm} \times 10 \text{ mm}$ . The cold and hot sides of single-leg devices were soldered to Cu plates using Ag-based solder.

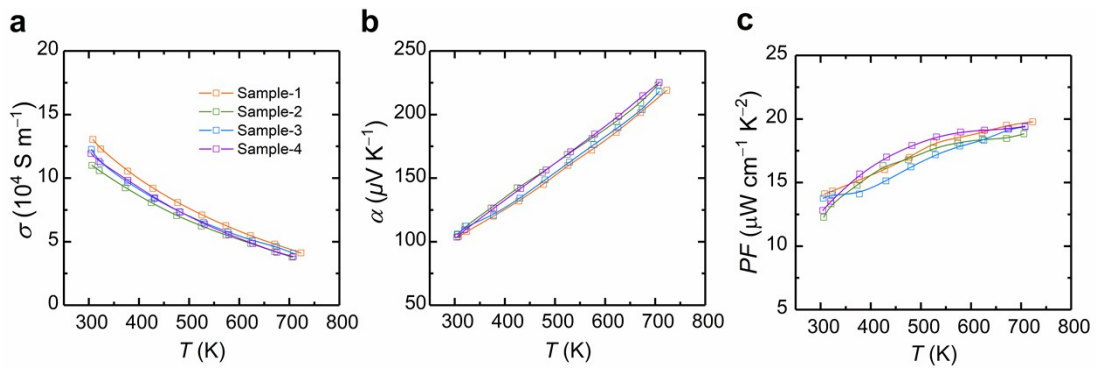

**Supplementary Fig. 11 The reproducibility of electrical properties for  $\text{Cu}_3\text{SbSe}_4$ -5 wt%  $\text{CuAlS}_2$ .** Temperature dependence of (a) conductivity  $\sigma$ , (b) Seebeck coefficient  $\alpha$  and (c) power factor  $PF$

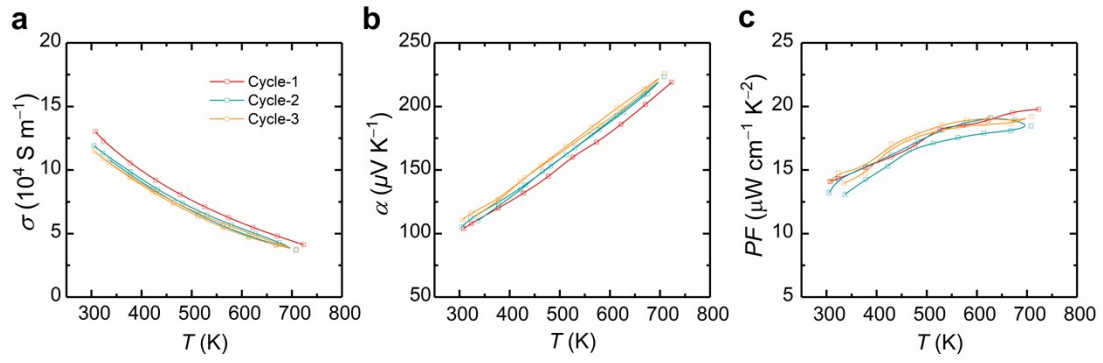

**Supplementary Fig. 12 Electrical transport properties measurement for  $\text{Cu}_3\text{SbSe}_4$ -5 wt%  $\text{CuAlS}_2$ .** Temperature dependence of (a) conductivity  $\sigma$ , (b) Seebeck coefficient  $\alpha$  and (c) power factor  $PF$  under several thermal cycles.



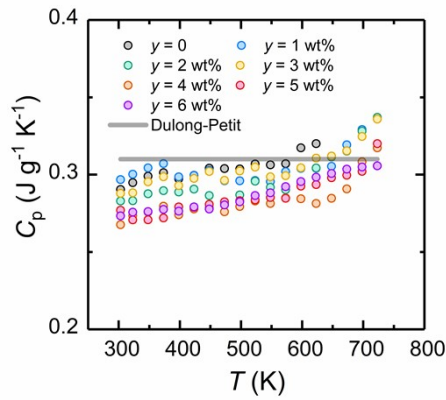

**Supplementary Fig. 13** Temperature dependent specific heat capacity ( $C_p$ ) for  $\text{Cu}_3\text{SbSe}_{4-y}\text{CuAlS}_2$  ( $y = 1, 2, 3, 4, 5$  and  $6$  wt%) samples.

As suggested by the literature<sup>11</sup>, heat capacity measurement is the most challenging task among the measurements of all the thermoelectric parameters. For complex materials with similar chemical compositions, the fluctuation of data due to system error may lead to unreliable conclusion in thermal conductivity. In this case, it is safe to use Dulong-Petit value here in this study.

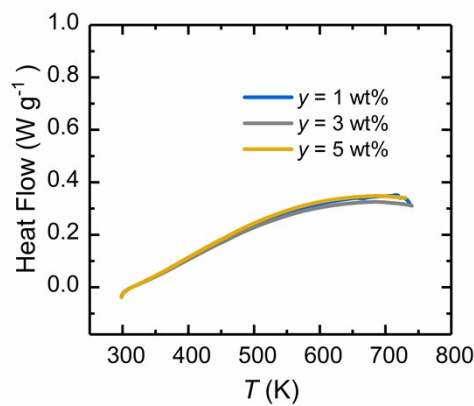

**Supplementary Fig. 14** Heat flow for  $\text{Cu}_3\text{SbSe}_{4-y}\text{CuAlS}_2$  ( $y = 1, 3$  and  $5$  wt%) samples.

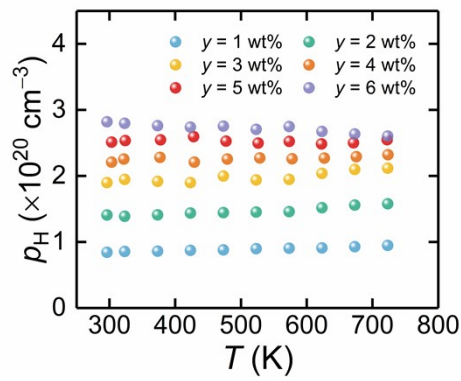

**Supplementary Fig. 15** Hall carrier concentration of  $\text{Cu}_3\text{SbSe}_{4-y}\text{CuAlS}_2$  ( $y = 1-6$  wt%) samples as a function of temperature.

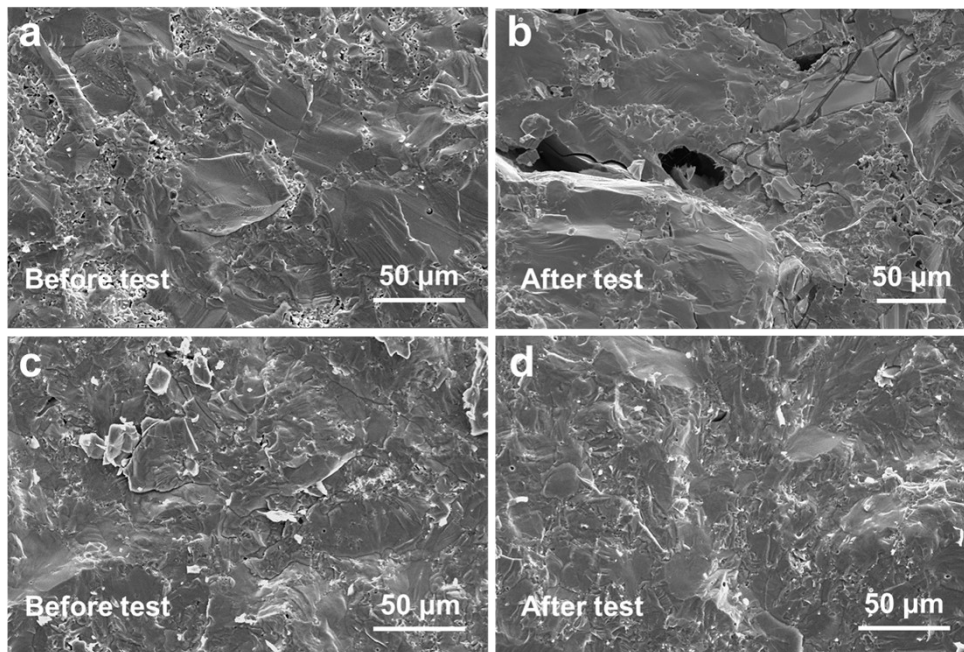

**Supplementary Fig. 16** SEM images of the fracture surfaces of (a) before test and (b) after test for  $\text{Cu}_3\text{SbSe}_4$  and (c) before test and (d) after test for  $\text{Cu}_3\text{SbSe}_4-5 \text{ wt\% CuAlS}_2$  bulk materials.

**Supplementary Table 2** The density ( $\rho$ ) of  $\text{Cu}_3\text{SbSe}_{4-y}\text{CuAlS}_2$  ( $y = 1-6$  wt%) composites.

| Samples     | $\rho(\text{g cm}^{-3})$ | Theoretical density ( $\text{g cm}^{-3}$ ) | Relative density (%) |
|-------------|--------------------------|--------------------------------------------|----------------------|
| $y = 1$ wt% | 5.732                    | 5.64                                       | 0.981                |
| $y = 2$ wt% | 5.695                    | 5.56                                       | 0.971                |
| $y = 3$ wt% | 5.659                    | 5.57                                       | 0.977                |
| $y = 4$ wt% | 5.623                    | 5.53                                       | 0.974                |
| $y = 5$ wt% | 5.587                    | 5.51                                       | 0.974                |
| $y = 6$ wt% | 5.552                    | 5.47                                       | 0.971                |

**Density of state effective mass and Pisarenko relationship calculation:** We have calculated the following equations by using single parabolic band (SPB) model based on the acoustic phonon scattering mechanism<sup>12</sup>. The Seebeck coefficient  $\alpha$  is given by:

$$\alpha(\zeta) = \frac{k_B}{e} \left[ \frac{\left(r + \frac{5}{2}\right) F_{\left(r + \frac{3}{2}\right)}(\zeta)}{\left(r + \frac{3}{2}\right) F_{\left(r + \frac{1}{2}\right)}(\zeta)} - \zeta \right] \#(S1)$$

The hole concentration  $p_H$  is given by:

$$p_H = \frac{(2m^* k_B T)^{\frac{3}{2}} \left(r + \frac{3}{2}\right)^2 F_{\left(r + \frac{1}{2}\right)}(\zeta)}{3\pi^2 \hbar^3 \left(2r + \frac{3}{2}\right) F_{\left(2r + \frac{1}{2}\right)}(\zeta)} = \frac{1}{eR_H} \#(S2)$$

The Fermi integral is given by:

$$F_x(\zeta) = \int_0^{\infty} \frac{\varepsilon^x}{1 + \exp(\varepsilon - \zeta)} d\varepsilon \#(S3)$$

In the equations above,  $\zeta$  is the reduced Fermi level,  $k_B$  is the Boltzmann constant,  $e$  is electron charge,  $r$  is the scattering factor,  $m^*$  is the density of state effective mass,  $\hbar$  is the reduced Planck constant.

**Lorentz constant calculation:** The total thermal conductivity of thermoelectric materials can be written as  $\kappa = \kappa_e + \kappa_L$ , where  $\kappa_e$  and  $\kappa_L$  are the electronic thermal conductivity and lattice thermal conductivity, respectively. Therefore, the  $\kappa_L$  can be obtained by subtracting the  $\kappa_e$  from the total thermal conductivity. According to Wiedemann-Franz law:  $\kappa_e = L\sigma T$ , where  $L$ ,  $\sigma$ , and  $T$  are the Lorentz constant, electrical conductivity and absolute temperature, respectively. The number of  $L$  is estimated based on the SPB model<sup>13</sup>:

$$L = 1.5 + \exp\left(-\frac{|\alpha|}{116}\right) \#S4$$

where  $L$  is in  $10^{-8} \text{ W } \Omega \text{ K}^{-2}$  and  $\alpha$  is in  $\mu\text{V/K}$ . And the obtained  $L$ ,  $\kappa_L$  are shown in Supplementary Fig. 6.

**Thermoelectric power generation efficiency:** The device efficiency  $\eta$  is calculated by:

$$\eta = \frac{P}{Q} \times 100\% \quad \#S5$$

The output power is calculated by:

$$P = IV_{out}$$

where  $Q$ ,  $I$  and  $V_{out}$  are the heat flow per unit time, the current in the circuit and the load voltage, respectively.

**Weighted mobility and quality factor calculation:** Here the weighted mobility  $\mu_w$  is used to evaluate the intrinsic electrical transport properties, which is defined as:

$$\mu_w = \frac{3h^3\sigma}{8\pi e(2m_e k_B T)^{\frac{3}{2}}} \left[ \frac{\exp\left[\frac{|\alpha|}{k_B} - 2\right]}{e} + \frac{\frac{3|\alpha|}{\pi^2 k_B}}{e} \right] \left[ \frac{1}{1 + \exp\left[-5\left(\frac{|S|}{k_B} - 1\right)\right]} + \frac{1}{1 + \exp\left[5\left(\frac{|\alpha|}{k_B} - 1\right)\right]} \right] \quad \#S6$$

And the quality factor  $B$  can be calculated by:

$$B = \left(\frac{k_B}{e}\right)^2 \frac{8\pi e(2m_e k_B T)^{\frac{3}{2}} \mu_w}{3h^3 \kappa_L} T \quad \#S7$$

## References

- 1 Y. X. Wu, Z. W. Chen, P. F. Nan, F. Xiong, S. Q. Lin, X. Y. Zhang, Y. Chen, L. D. Chen, B. H. Ge and Y. Z. Pei, 2019, *Joule* **3**, 1276–1288.
- 2 K. Biswas, J. Q. He, I. D. Blum, C.-I. Wu, T. P. Hogan, D. N. Seidman, V. P. Dravid and M. G. Kanatzidis, *Nature*, 2012, **489**, 414–418.
- 3 Y. X. Qin, T. Hong, B. C. Qin, D. Y. Wang, W. K. He, X. Gao, Y. Xiao and L.-D. Zhao, *Adv. Funct. Mater.*, 2021, **31**, 2102185.
- 4 B. B. Jiang, Y. Yu, H. Y. Chen, J. Cui, X. X. Liu, L. Xie and J. Q. He, *Nat. Commun.*, 2021, **12**, 3234.

- 5 Z. L. Bu, X. Y. Zhang, B. Shan, J. Tang, H. X. Liu, Z. W. Chen, S. Q. Lin, W. Li and Y. Z. Pei, *Sci. Adv.*, 2021, **7**, eabf2738.
- 6 W. Li, L. L. Zheng, B. H. Ge, S. Q. Lin, X. Y. Zhang, Z. W. Chen, Y. J. Chang and Y. Z. Pei, *Adv. Mater.*, 2017, **29**, 1605887.
- 7 C. J. Zhou, Y. K. Lee, Y. Yu, S. J. Byun, Z.-Z. Luo, H. Lee, B. Z. Ge, Y.-L. Lee, X. Q. Chen, J. Y. Lee, O. C. Miréidin, H. Chang, J. Im, S.-P. Cho, M. Wuttig, V. P. Dravid, M. G. Kanatzidis and I. Chung, *Nat. Mater.*, 2021, **20**, 1378–1384.
- 8 H. W. Ming, G. F. Zhu, C. Zhu, X. Y. Qin, T. Chen, J. Zhang, D. Li, H. X. Xin and B. Jabar, *ACS Nano*, 2021, **15**, 10532–10541.
- 9 Y. B. Luo , J. Y. Yang , Q. H. Jiang , W. X. Li , D. Zhang , Z. W. Zhou , Y. D. Cheng , Y. Y. Ren and X. He, *Adv. Energy Mater.*, 2016, **6**, 1600007.
- 10 H. H. Hu, H.-L. Zhuang, Y. L. Jiang, J. L. Shi, J.-W. Li, B. W. Cai, Z. R. Han, J. Pei, B. Su, Z.-H. Ge, B.-P. Zhang and J.-F. Li, *Adv. Mater.*, 2021, **33**, 2103633.
- 11 Z.H. Liu, W.H. Gao, F.K. Guo, W. Cai, Q. Zhang, and J.H. Sui, *Materials Lab*, 2022, **1**, 220003.
- 12 J. W. Shen, Z. W. Chen, S. Q. lin, L. L. Zheng, W. Li and Y. Z. Pei, *J. Mater. Chem. C*, 2015, **4**, 209–214.
- 13 H. S. Kim, Z. M. Gibbs, Y. Tang, H. Wang, and G. J. Snyder, *APL Mater.*, 2015, **3**, 041506.
